# Supplementary material for: Metabolic Rewiring in Tea Plants in Response to Gray Blight Disease Unveiled by Multi-Omics Analysis
Source: MDPI journal article supplement (doi:10.3390/metabo13111122), 2023-11-01
Supplement: s1 [file s1]

## Supplementary Materials

### Metabolic Rewiring in tea plants in Response to Gray Blight Disease Unveiled by Multi-Omics Analysis

Shiqin Zheng <sup>1,2,3</sup>, Zhenghua Du <sup>2</sup>, Xiaxia Wang <sup>2</sup>, Chao Zheng <sup>2</sup>,  
Zonghua Wang <sup>3,4,\*</sup> and Xiaomin Yu<sup>2,\*</sup>

<sup>1</sup>Tea Research Institute, Fujian Academy of Agricultural Sciences,  
Fuzhou 350013, China

<sup>2</sup>Center for Plant Metabolomics, Haixia Institute of Science and Technology,  
Fujian Agriculture and Forestry University, Fuzhou 350002, China

<sup>3</sup>State Key Laboratory of Ecological Pest Control for Fujian and Taiwan  
Crops, College of Plant Protection, Fujian Agriculture and Forestry  
University, Fuzhou 350002, China

<sup>4</sup>Fuzhou Institute of Oceanography, Minjiang University,  
Fuzhou 350108, China

\* **Correspondence:** wangzh@fafu.edu.cn (Z.W.); xmyu0616@fafu.edu.cn (X.Y.)

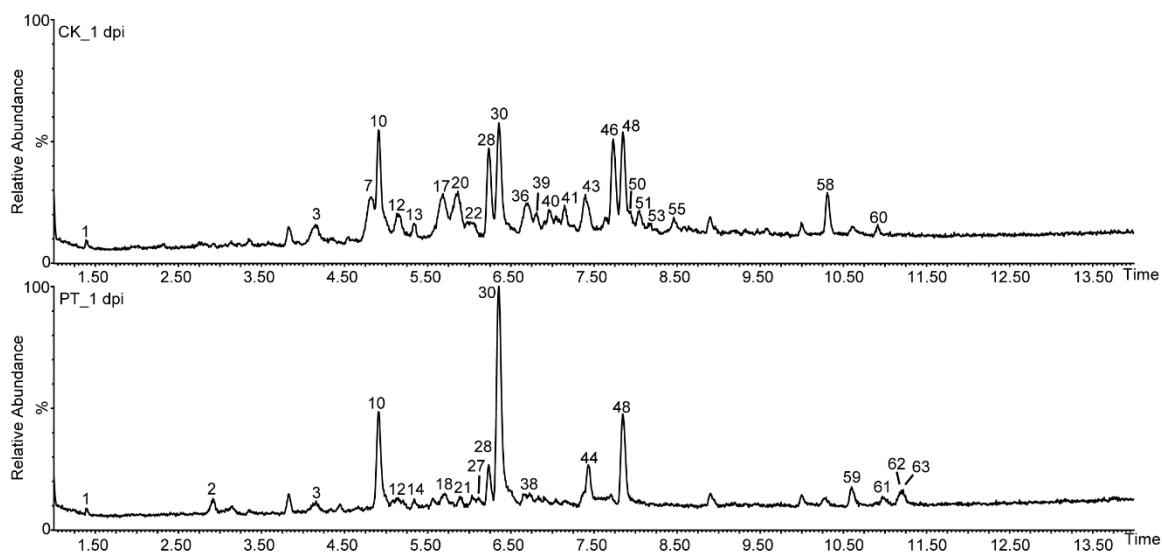

**Figure S1.** Representative total ion chromatograms of mock-inoculated and fungal-inoculated tea leaves at 1 dpi in the negative ionization mode. PT, tea leaves inoculated with *P. theae*. CK, tea leaves inoculated with the mock control. Peak numbering is the same as Table 1.

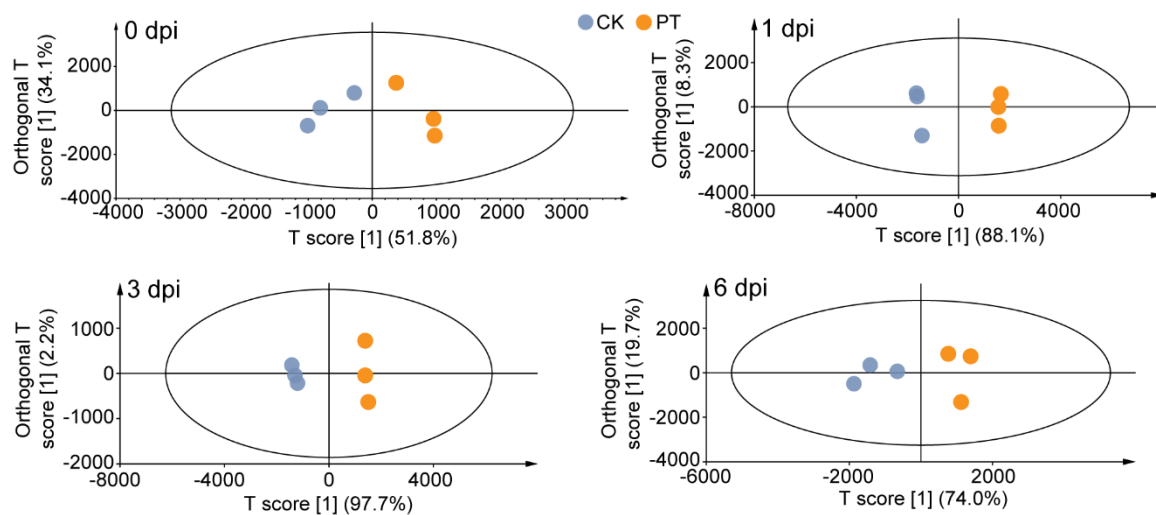

**Figure S2.** OPLS-DA analysis of the metabolomics datasets. PT, tea leaves inoculated with *P. theae*. CK, tea leaves inoculated with the mock control.

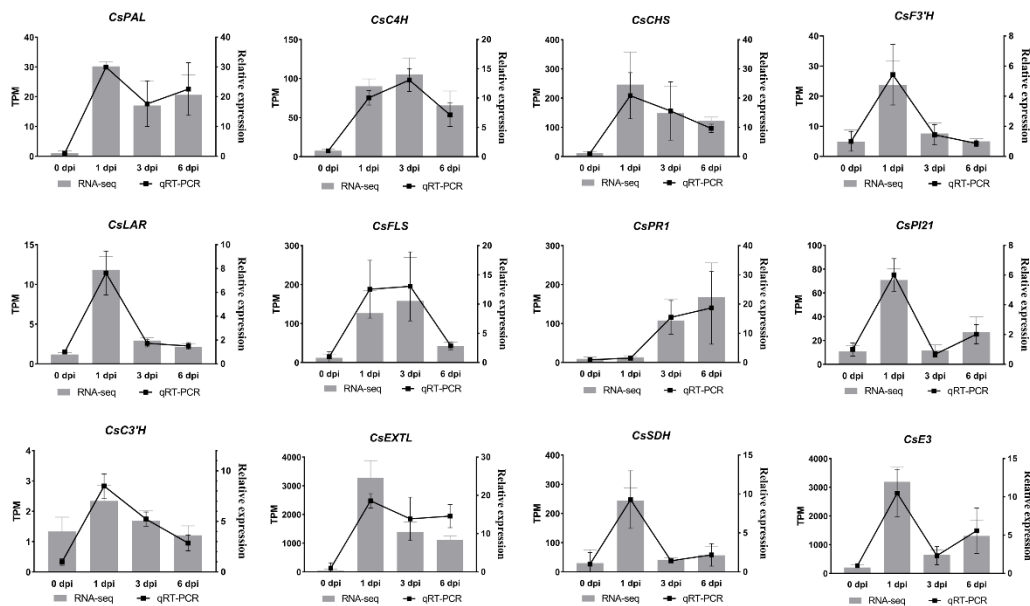

**Figure S3.** qRT-PCR validation of RNA-seq DEGs. PAL, phenylalanine ammonia-lyase; C4H, cinnamate-4-hydroxylase; CHS, chalcone synthase; F3'H, flavonoid 3'-hydroxylase; LAR, leucocyanidin reductase; FLS, flavonol synthase; PR1, pathogenesis-related protein 1; PI21, PYRICULARIA ORYZAE RESISTANCE 21 ; C3'H, 5-*O*-(4-coumaroyl)-D-quinic acid 3'-monooxygenase; EXTL, extension-like; SDH, shikimate dehydrogenase; E3, E3 ubiquitin ligase. The left Y-axis represents the expression data (gray bars) and the right Y-axis represents the relative expression values obtained through RT-qPCR analysis (black lines). *GADPH* gene (accession no. KA295375.1) was used as the internal control. The expression of genes in 0 dpi is set to 1.0. All values are mean  $\pm$  SD (n = 3).

1 dpi

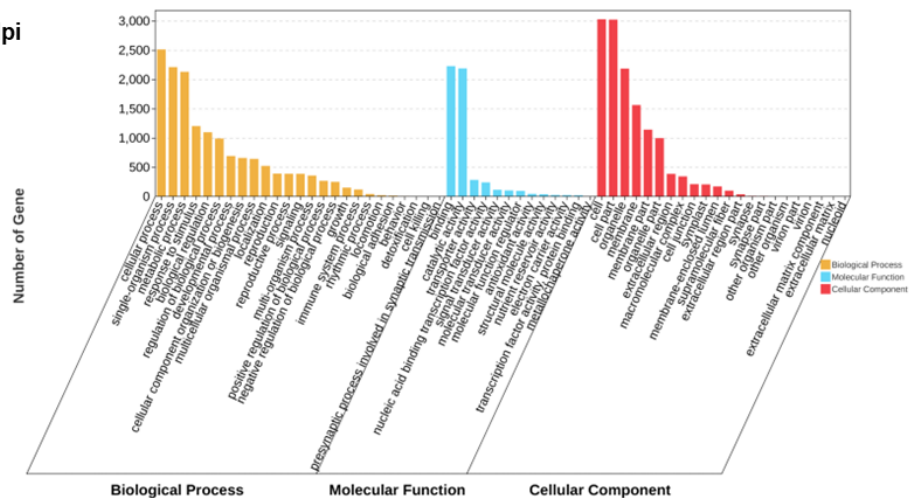

3 dpi

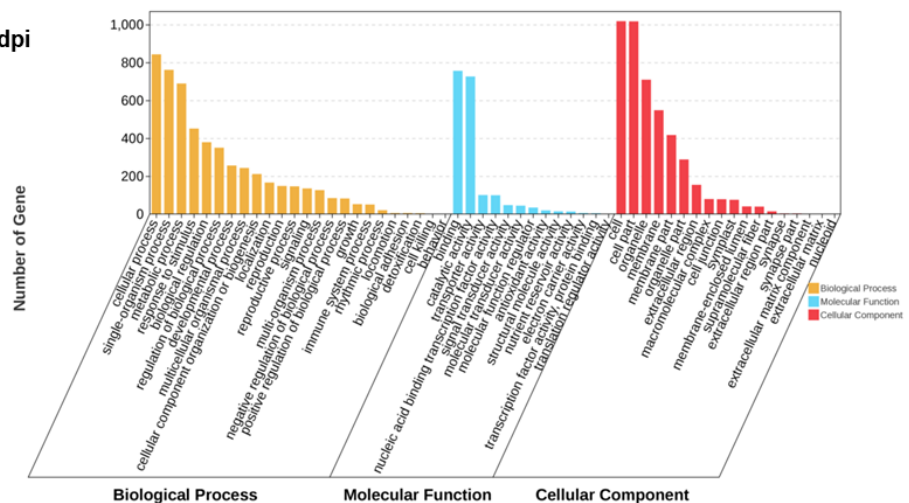

6 dpi

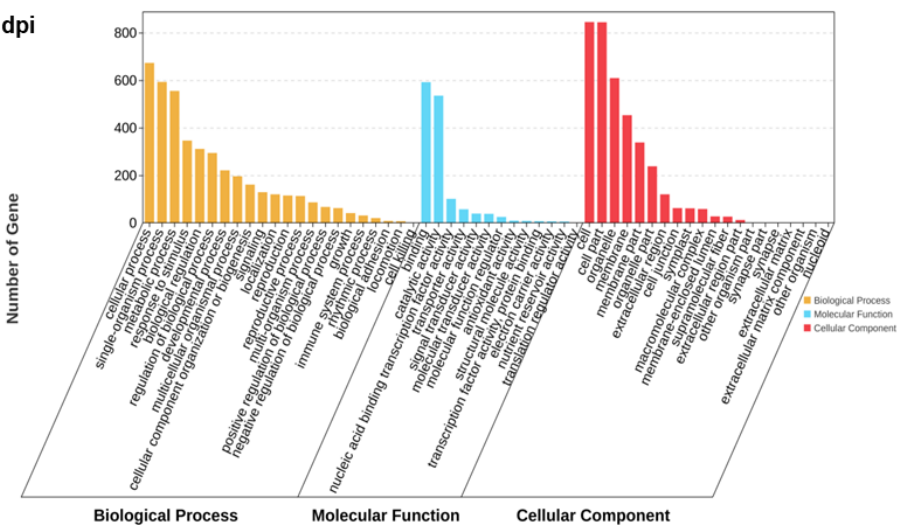

**Figure S4.** Gene ontology (GO) enrichment analysis of differentially expressed genes in gray blight-infected tea plants at 1, 3 and 6 dpi.

**Table S1. List of primers for qRT-PCR.**

| Target Gene <sup>a</sup> | Forward primer (5'-3')    | Reverse primer (5'-3')   |
|--------------------------|---------------------------|--------------------------|
| <i>CsPAL</i>             | TCCAATTCCTTGCCAATCCTGTAA  | ATCAACTGCCTCGGCTGTCTTTCT |
| <i>CsC4H</i>             | TGCAAAGCTCTCTGGCTATG      | CCTGAACTCTTCTGGGTCTTC    |
| <i>CsCHS</i>             | GTGCTATCGATGGGCATCTT      | AGGGTTGGAATGCCTCATTTA    |
| <i>CsF3'H</i>            | GTTCGACCAGAACGATTCTACC    | ATAACTGGACCATACGCAACCCTA |
| <i>CsLAR</i>             | AACTCCCTAGAGTAACCATCA     | GATGAAGATGTCGTGGGTGAA    |
| <i>CsFLS</i>             | TGGAAAGACGGTAATTGGGTAG    | ACTCCTGTGAAGAACTCTTG     |
| <i>CsPR1</i>             | TCCTATGCCCAAACTCACAACAAG  | ACCCATCCTCGAACTAGCATACCT |
| <i>CsPI21</i>            | CTACAGGAATCCAAAGAGTCCAA   | CATAGCATTGCCCACAACATATC  |
| <i>CsC3'H</i>            | CGGCAACCTCTACGACATAAA     | CAACTCTGAGCTCGAACTATCA   |
| <i>CsEXTL</i>            | TGTCTCTGAGCTTGCCATTAG     | GAGGTGGTGGTGATTTGTAGT    |
| <i>CsSDH</i>             | GTATTGCTCCCATCTCCGCTCACTG | ATGACAACCCTCGCTCCTCTGCTT |
| <i>CsE3</i>              | GATGCTGCTACTCGGTTCTT      | GGCATGACGGTTACATCATTTTC  |

<sup>a</sup>PAL, phenylalanine ammonia-lyase; C4H, cinnamate-4-hydroxylase; CHS, chalcone synthase; F3'H, flavonoid 3'-hydroxylase; LAR, leucocyanidin reductase; FLS, flavonol synthase; PR1, pathogenesis-related protein 1; PI21, PYRICULARIA ORYZAE RESISTANCE 21 ; C3'H, 5-*O*-(4-coumaroyl)-D-quinic acid 3'-monooxygenase; EXTL, extension-like; SDH, shikimate dehydrogenase; E3, E3 ubiquitin ligase.

**Table S2. The quality of RNA-seq data.**

| <b>Sample</b> | <b>Clean reads</b> | <b>Q30</b> | <b>GC%</b> | <b>Mapped rate (%)</b> |
|---------------|--------------------|------------|------------|------------------------|
| PT1_0dpi      | 25805408           | 93.21      | 44         | 87.50                  |
| PT2_0dpi      | 26011094           | 92.30      | 45         | 88.18                  |
| PT3_0dpi      | 36586286           | 95.14      | 45         | 89.61                  |
| PT1_1dpi      | 25979638           | 89.29      | 43         | 86.66                  |
| PT2_1dpi      | 26575605           | 93.38      | 43         | 86.90                  |
| PT3_1dpi      | 26345386           | 91.98      | 43         | 86.09                  |
| PT1_3dpi      | 28349686           | 90.43      | 43         | 86.98                  |
| PT2_3dpi      | 26270282           | 92.31      | 43         | 86.00                  |
| PT3_3dpi      | 27623253           | 93.89      | 43         | 87.12                  |
| PT1_6dpi      | 28009516           | 91.86      | 43         | 86.84                  |
| PT2_6dpi      | 26367665           | 89.98      | 43         | 87.02                  |
| PT3_6dpi      | 26717807           | 91.03      | 44         | 87.32                  |
